# Supplementary material for: Promoter expression of HERV-K (HML-2) provirus-derived sequences is related to LTR sequence variation and polymorphic transcription factor binding sites
Source: PubMed Central journal article supplement (PMC6102855; doi:10.1186/s12977-018-0441-2), 2018-08-20
Supplement: 12977_2018_441_MOESM1_ESM.pdf [file 12977_2018_441_MOESM1_ESM.pdf]

**Supplementary Table S1.** HML-2 transcript levels detected through single-genome sequencing in breast cancer cell lines of varying molecular subtype.

| Provirus | Breast Cancer Molecular Subtype |                               |                    | Total Number of Transcripts |
|----------|---------------------------------|-------------------------------|--------------------|-----------------------------|
|          | Luminal <sup>a</sup>            | HER2/ <i>neu</i> <sup>b</sup> | Basal <sup>c</sup> |                             |
| 1q22     | 11                              | 30                            | 28                 | 69                          |
| 3q12.3   | 20                              | 17                            | 15                 | 52                          |
| 21q21.1  | 2                               | -                             | 7                  | 9                           |
| 11p15.4  | 8                               | 4                             | 1                  | 13                          |
| 7p22.1   | 3                               | 7                             | -                  | 10                          |
| 3q21.2   | 2                               | 5                             | 1                  | 8                           |
| K105     | 3                               | 1                             | 1                  | 5                           |
| 16p11.2  | 3                               | -                             | 2                  | 5                           |
| 22q11.21 | -                               | 3                             | -                  | 3                           |
| 5p13.3   | -                               | 3                             | -                  | 3                           |

<sup>a</sup>Luminal cell lines: ZR-75-1, MCF-7, T47D; <sup>b</sup>HER2/*neu* cell lines: SK-BR-3, Hcc1954;

<sup>c</sup>Basal cell lines: BT20, Hs578T, MDA-MB-231
