# Supplementary material for: Promoter expression of HERV-K (HML-2) provirus-derived sequences is related to LTR sequence variation and polymorphic transcription factor binding sites
Source: PubMed Central journal article supplement (PMC6102855; doi:10.1186/s12977-018-0441-2), 2018-08-20
Supplement: 12977_2018_441_MOESM2_ESM.pdf [file 12977_2018_441_MOESM2_ESM.pdf]

**Supplementary Table S2.** HML-2 similarity matrices.**HML-2 Percent Sequence Identity Matrix**

|                 | <b>1q22</b> | <b>3q12.2</b> | <b>3q21.2</b> | <b>5p13.3</b> | <b>7p22.1b</b> | <b>8p23.1c</b> | <b>11p15.4</b> | <b>21q21.1</b> | <b>22q11.21</b> |                 |
|-----------------|-------------|---------------|---------------|---------------|----------------|----------------|----------------|----------------|-----------------|-----------------|
| <b>1q22</b>     | 100         | 94            | 97            | 97            | 99             | 70             | 69             | 97             | 98              | <b>1q22</b>     |
| <b>3q12.3</b>   |             | 100           | 94            | 95            | 95             | 70             | 69             | 95             | 94              | <b>3q12.3</b>   |
| <b>3q21.2</b>   |             |               | 100           | 97            | 97             | 68             | 68             | 97             | 97              | <b>3q21.2</b>   |
| <b>5p13.3</b>   |             |               |               | 100           | 97             | 69             | 68             | 97             | 97              | <b>5p13.3</b>   |
| <b>7p22.1b</b>  |             |               |               |               | 100            | 70             | 69             | 97             | 98              | <b>7p22.1b</b>  |
| <b>8p23.1c</b>  |             |               |               |               |                | 100            | 95             | 69             | 70              | <b>8p23.1c</b>  |
| <b>11p15.4</b>  |             |               |               |               |                |                | 100            | 69             | 69              | <b>11p15.4</b>  |
| <b>21q21.1</b>  |             |               |               |               |                |                |                | 100            | 97              | <b>21q21.1</b>  |
| <b>22q11.21</b> |             |               |               |               |                |                |                |                | 100             | <b>22q11.21</b> |

**HML-2 Percent Expression Similarity Matrix**

|                 | <b>1q22</b> | <b>3q12.2</b> | <b>3q21.2</b> | <b>5p13.3</b> | <b>7p22.1b</b> | <b>8p23.1c</b> | <b>11p15.4</b> | <b>21q21.1</b> | <b>22q11.21</b> |                 |
|-----------------|-------------|---------------|---------------|---------------|----------------|----------------|----------------|----------------|-----------------|-----------------|
| <b>1q22</b>     | 100         | 32            | 95            | 95            | 95             | 68             | 53             | 89             | 89              | <b>1q22</b>     |
| <b>3q12.3</b>   |             | 100           | 37            | 26            | 26             | 63             | 68             | 26             | 37              | <b>3q12.3</b>   |
| <b>3q21.2</b>   |             |               | 100           | 89            | 89             | 74             | 58             | 89             | 89              | <b>3q21.2</b>   |
| <b>5p13.3</b>   |             |               |               | 100           | 100            | 63             | 47             | 100            | 89              | <b>5p13.3</b>   |
| <b>7p22.1b</b>  |             |               |               |               | 100            | 63             | 47             | 100            | 89              | <b>7p22.1b</b>  |
| <b>8p23.1c</b>  |             |               |               |               |                | 100            | 74             | 63             | 74              | <b>8p23.1c</b>  |
| <b>11p15.4</b>  |             |               |               |               |                |                | 100            | 47             | 47              | <b>11p15.4</b>  |
| <b>21q21.1</b>  |             |               |               |               |                |                |                | 100            | 89              | <b>21q21.1</b>  |
| <b>22q11.21</b> |             |               |               |               |                |                |                |                | 100             | <b>22q11.21</b> |
