# Supplementary material for: Promoter expression of HERV-K (HML-2) provirus-derived sequences is related to LTR sequence variation and polymorphic transcription factor binding sites
Source: PubMed Central journal article supplement (PMC6102855; doi:10.1186/s12977-018-0441-2), 2018-08-20
Supplement: 12977_2018_441_MOESM3_ESM.pdf [file 12977_2018_441_MOESM3_ESM.pdf]

**Supplementary Table S3.** HOX-PBX binding site sequences and genomic coordinates (hg19).

| Proviral LTR       | Strand | Genomic Coordinates (hg19) | Sequence          |
|--------------------|--------|----------------------------|-------------------|
| Consensus sequence |        |                            | AACCCGATT----GTAT |
| 1q22 5' LTR        | -      | chr1:155605078-155605090   | AACCC----GATTGTAT |
| 1q22 3' LTR        | -      | chr1:155596866-155596878   | AACCC----GATTGTAT |
| 3q12.3 5' LTR      | +      | chr3:101411273-101411289   | AACCCGATTGATTGTAC |
| 3q12.3 3' LTR      | +      | chr3:101419427-101419439   | AACCC----GATTGTAC |
| 3q21.2 5' LTR      | +      | chr3:125609829-125609841   | AACCT----GATTGTAT |
| 3q21.2 3' LTR      | +      | chr3:125618163-125618175   | AACCC----GATTGTAT |
| 5p13.3 5' LTR      | -      | chr5:30495665-30495677     | AACCC----GATTGTAT |
| 5p13.3 3' LTR      | -      | chr5:30487169-30487181     | AACCC----GATTGTAT |
| 7p22.1b 5' LTR     | -      | chr7:4630970-4630982       | AACCC----GATTGTAT |
| 8p23.1c 5' LTR     | -      | chr8:12082912-12082924     | AACCC----GATTGTAC |
| 8p23.1c 3' LTR     | -      | chr8:12074412-12074424     | AACCC----GATTGTAC |
| 11p15.4 5' LTR     | -      | chr11:3477624-3477636      | AACCC----AATTGTAC |
| 11p15.4 3' LTR     | -      | chr11:3469098-3469110      | AACCC----GATTGTAC |
| 21q21.1 5' LTR     | -      | chr21:19941404-19941416    | AACCC----AATTGTAT |
| 22q11.21 5' LTR    | +      | chr22:18926722-18926734    | AACCC----GATTGTAT |
| 22q11.21 3' LTR    | +      | chr22:18934929-18934941    | AACCC----GATTGTAT |
