# Supplementary material for: Promoter expression of HERV-K (HML-2) provirus-derived sequences is related to LTR sequence variation and polymorphic transcription factor binding sites
Source: PubMed Central journal article supplement (PMC6102855; doi:10.1186/s12977-018-0441-2), 2018-08-20
Supplement: 12977_2018_441_MOESM4_ESM.pdf [file 12977_2018_441_MOESM4_ESM.pdf]

**Supplementary Table S4.** RFX3 binding site sequences and genomic coordinates (hg19).

| Proviral LTR       | Strand | Genomic Coordinates (hg19) | Sequence            |
|--------------------|--------|----------------------------|---------------------|
| Consensus sequence |        |                            | CTTGTGACCCTGACACATC |
| 1q22 5' LTR        | -      | chr1:155604875-155604893   | CTTGTGACCCTGACACATC |
| 1q22 3' LTR        | -      | chr1:155596663-155596681   | CTTGTGACCCTGACACATC |
| 3q12.3 5' LTR      | +      | chr3:101411487-101411505   | CTTGTGACCATGACACATC |
| 3q12.3 3' LTR      | +      | chr3:101419635-101419653   | CTTGTGACCATGACACATC |
| 3q21.2 5' LTR      | +      | chr3:125610037-125610055   | CTTGTGACCCTGACACATC |
| 3q21.2 3' LTR      | +      | chr3:125618371-125618389   | CTTGTGACCCTGACACATC |
| 5p13.3 5' LTR      | -      | chr5:30495462-30495480     | CTTGTGACCCTGACACATC |
| 5p13.3 3' LTR      | -      | chr5:30486966-30486984     | CTTGTGACCCTGACACATC |
| 7p22.1b 5' LTR     | -      | chr7:4630767-4630783       | CTTGTGACCCTGACACATC |
| 8p23.1c 5' LTR     | -      | chr8:12082684-12082702     | CCTGCTTTCCTAGTATATT |
| 8p23.1c 3' LTR     | -      | chr8:12082684-12082702     | CCTGCTCTCCTATTACATT |
| 11p15.4 5' LTR     | -      | chr11:3477396-3477414      | CCTGCTCTCCTACTACATT |
| 11p15.4 3' LTR     | -      | chr11:3468868-3468886      | CCTGCTCTCCTATTACATT |
| 21q21.1 5' LTR     | -      | chr21:19941201-19941219    | CTTGTGACCCTGACACATC |
| 22q11.21 5' LTR    | +      | chr22:18926930-18926948    | CTTGTGACCCTGACACATC |
| 22q11.21 3' LTR    | +      | chr22:18935137-18935155    | CTTGTGACCCTGACACATC |
