# Supplementary material for: Promoter expression of HERV-K (HML-2) provirus-derived sequences is related to LTR sequence variation and polymorphic transcription factor binding sites
Source: PubMed Central journal article supplement (PMC6102855; doi:10.1186/s12977-018-0441-2), 2018-08-20
Supplement: 12977_2018_441_MOESM5_ESM.pdf [file 12977_2018_441_MOESM5_ESM.pdf]

**Supplementary Table S5.** ATF binding site sequences and genomic coordinates (hg19).

| Proviral LTR       | Strand | Genomic Coordinates (hg19) | Sequence                |
|--------------------|--------|----------------------------|-------------------------|
| Consensus sequence |        |                            | GCCTTAGGGCTGGAG--GTGGGA |
| 1q22 5' LTR        | -      | chr1:155605040-155605060   | GCCTTAGGGCTGGAG--GTGGGA |
| 1q22 3' LTR        | -      | chr1:155596828-155596848   | GCCTTAGGGCTGGAG--GTGGGA |
| 3q12.3 5' LTR      | +      | chr3:101411318-101411340   | GCCTTAGGGCTGGAGGTGTGGGA |
| 3q12.3 3' LTR      | +      | chr3:101419468-101419488   | GCCTTAGGGCTGGAG--GTGGGA |
| 3q21.2 5' LTR      | +      | chr3:125609870-125609890   | GCCTTAGGGCTGGAG--GTGGGA |
| 3q21.2 3' LTR      | +      | chr3:125618204-125618224   | GCCTTAAGGCTGGAA--GTAGGA |
| 5p13.3 5' LTR      | -      | chr5:30495627-30495647     | GCCTTAGGGCTGGAG--GTGGGA |
| 5p13.3 3' LTR      | -      | chr5:30487131-30487151     | GCCTTAGGGCTGGAG--GTGGGA |
| 7p22.1b 5' LTR     | -      | chr7:4630932-4630952       | GCCTTAGGGCTGGAG--GTGGGA |
| 8p23.1c 5' LTR     | -      | chr8:12082873-12082893     | GCCCTGTGATGGGAG--GCAAGA |
| 8p23.1c 3' LTR     | -      | chr8:12074373-12074393     | GCCCTGTGGCGGGAG--GCGAGA |
| 11p15.4 5' LTR     | -      | chr11:3477585-3477605      | GCCCTGTGACGGGAG--GCGAGA |
| 11p15.4 3' LTR     | -      | chr11:3469059-3469079      | GCCCTGTGGCGGGAG--GCGAGA |
| 21q21.1 5' LTR     | -      | chr21:19941366-19941386    | GCCTTAGGGCTGGAG--GTGGGA |
| 22q11.21 5' LTR    | +      | chr22:18926763-18926783    | GCCTTAGGGCTGGAG--GTGGGA |
| 22q11.21 3' LTR    | +      | chr22:18934970-18934990    | GCCTTAGGGCTGGAG--GTGGGA |
