# Supplementary material for: Promoter expression of HERV-K (HML-2) provirus-derived sequences is related to LTR sequence variation and polymorphic transcription factor binding sites
Source: PubMed Central journal article supplement (PMC6102855; doi:10.1186/s12977-018-0441-2), 2018-08-20
Supplement: 12977_2018_441_MOESM6_ESM.pdf [file 12977_2018_441_MOESM6_ESM.pdf]

**Supplementary Table S6.** RORA binding site sequences and genomic coordinates (hg19).

| Proviral LTR       | Strand | Genomic Coordinates (hg19) | Sequence                      |
|--------------------|--------|----------------------------|-------------------------------|
| Consensus sequence |        |                            | GTGTTTGTCTGCTGACCCTCTCCCCACAA |
| 1q22 5' LTR        | -      | chr1:155604898-155604926   | GTGTTTGTCTGCTGACCCTCTCCCCACAA |
| 1q22 3' LTR        | -      | chr1:155596686-155596714   | GTGTTTGTCTGCTGACCCTCTCCCCACAA |
| 3q12.3 5' LTR      | +      | chr3:101411454-101411482   | GTGTTTGTCTGCTGACCCTCTCCCCACTA |
| 3q12.3 3' LTR      | +      | chr3:101419602-101419630   | GTGTTTGTCTGCTGACCCTCTCCCCACTA |
| 3q21.2 5' LTR      | +      | chr3:125610004-125610032   | GTGTTTGTCTGCTGACCCTCTCCCCACAA |
| 3q21.2 3' LTR      | +      | chr3:125618338-125618366   | GTGTTTGTCTGCTGACCCTCTCCCCACAA |
| 5p13.3 5' LTR      | -      | chr5:30495485-30495513     | GTGTTTGTCTGCTGACCCTCTCCCCACAA |
| 5p13.3 3' LTR      | -      | chr5:30486989-30487017     | GTGTTTGTCTGCTGACCCTCTCCCCACAA |
| 7p22.1b 5' LTR     | -      | chr7:4630790-4630818       | ATGTTTGTCTGCTGACCCTCTCCCCACAA |
| 8p23.1c 5' LTR     | -      | chr8:12082707-12082731     | ATGTTT-TTTGTTGAC---CTCCTTATTA |
| 8p23.1c 3' LTR     | -      | chr8:12074205-12074232     | ATGTTT-TTTGTTGACCTTCTCCTTATTA |
| 11p15.4 5' LTR     | -      | chr11:3477419-3477443      | ATGTTT-TTTGTTGAC---CTCCTTAATA |
| 11p15.4 3' LTR     | -      | chr11:3468891-3468918      | ATGTTT-TTTGTTGACCTTCTCCTTATTA |
| 21q21.1 5' LTR     | -      | chr21:19941224-19941252    | GTGTTTGTCTGCTGACCCTCTCCCCACAA |
| 22q11.21 5' LTR    | +      | chr22:18926897-18926925    | GTGTTTGTCTGCTGACCCTCTCCCCACAA |
| 22q11.21 3' LTR    | +      | chr22:18935104-18935132    | GTGTTTGTCTGCTGACCCTCTCCCCACAA |
