# Supplementary material for: Promoter expression of HERV-K (HML-2) provirus-derived sequences is related to LTR sequence variation and polymorphic transcription factor binding sites
Source: PubMed Central journal article supplement (PMC6102855; doi:10.1186/s12977-018-0441-2), 2018-08-20

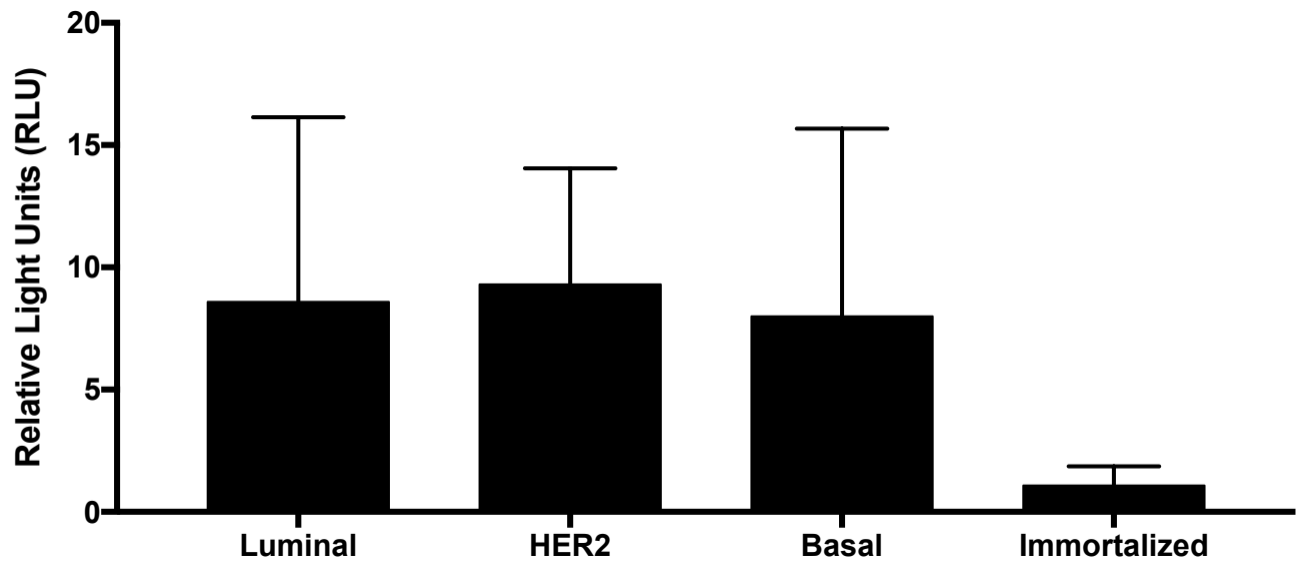

Supplement: 12977_2018_441_MOESM7_ESM.pdf [file 12977_2018_441_MOESM7_ESM.pdf]
