# Supplementary material for: Promoter expression of HERV-K (HML-2) provirus-derived sequences is related to LTR sequence variation and polymorphic transcription factor binding sites
Source: PubMed Central journal article supplement (PMC6102855; doi:10.1186/s12977-018-0441-2), 2018-08-20
Supplement: 12977_2018_441_MOESM9_ESM.pdf [file 12977_2018_441_MOESM9_ESM.pdf]

**Supplementary Table S7.** Culture methods for cell lines used.

| Base Medium                                                     | Supplements                                                                                                                                                                                                                                                                  | Cell Lines                                                                     |
|-----------------------------------------------------------------|------------------------------------------------------------------------------------------------------------------------------------------------------------------------------------------------------------------------------------------------------------------------------|--------------------------------------------------------------------------------|
| MEGM<br>(Mammary Epithelial Cell<br>Growth Medium) <sup>a</sup> | 4 mg/ml bovine pituitary extract <sup>a</sup><br>1 mg/ml human epidermal growth factor <sup>a</sup><br>1 mg/ml insulin <sup>a</sup><br>1 mg/ml hydrocortisone <sup>a</sup><br>1 mg/ml gentamicin sulfate/amphotericin-B <sup>a</sup><br>0.1 mg/ml cholera toxin <sup>b</sup> | HME <sup>l</sup><br>HMLE-Her2 <sup>m</sup><br>HMLE-Ras <sup>n</sup><br>MCF-10A |
|                                                                 |                                                                                                                                                                                                                                                                              | MDA-MB-361<br>MDA-MB-231                                                       |
| DMEM <sup>c</sup>                                               | 10% FBS <sup>d</sup><br>1% Pen-Strep <sup>e</sup>                                                                                                                                                                                                                            | MCF-7<br>BT20<br>BT474<br>Hs578T                                               |
| Ham's F-12 <sup>f</sup>                                         | 5% FBS <sup>d</sup><br>1 µg/ml hydrocortisone <sup>g</sup><br>5 µg/ml insulin <sup>h</sup>                                                                                                                                                                                   | SUM149<br>SUM159                                                               |
| Ham's F-12 <sup>f</sup>                                         | 5% FBS <sup>d</sup><br>10 ng/ml human epidermal growth factor <sup>i</sup><br>5 µg/ml insulin <sup>h</sup>                                                                                                                                                                   | SUM1315                                                                        |
| RPMI 1640 <sup>j</sup>                                          | 10% FBS <sup>d</sup><br>1% Pen-Strep <sup>e</sup>                                                                                                                                                                                                                            | Hcc1428<br>Hcc1419<br>Hcc1954<br>ZR-75-1<br>T47D                               |
| McCoy's 5A <sup>k</sup>                                         | 10% FBS <sup>d</sup><br>1% Pen-Strep <sup>e</sup>                                                                                                                                                                                                                            | SK-BR-3                                                                        |
| McCoy's 5A <sup>k</sup>                                         | 15% FBS <sup>d</sup><br>1% Pen-Strep <sup>e</sup>                                                                                                                                                                                                                            | Tera-1                                                                         |

<sup>a</sup>MEGM BulletKit, Lonza, Walkersville, MD, USA, Cat. No. CC-3150; <sup>b</sup>Sigma, St. Louis, MO, USA, Cat. No. C8052; <sup>c</sup>Gibco, Carlsbad, CA, USA, Cat. No. 10566-036; <sup>d</sup>Atlanta Biologicals, Norcross, GA, USA, Cat. No. S11195; <sup>e</sup>Gibco, Cat. No. 15140122; <sup>f</sup>Gibco, Cat. No. 31765-035; <sup>g</sup>Sigma, Cat. No. H4001; <sup>h</sup>Sigma, Cat. No. I2643; <sup>i</sup>Sigma, Cat. No. E9644; <sup>j</sup>Gibco, Cat. No. 61870-036; <sup>k</sup>Gibco, Cat. No. 16600-082; <sup>l</sup>hTERT-immortalized, non-transformed; <sup>m</sup>hTERT-immortalized, SV40 transformed, *ERBB2* overexpression; <sup>n</sup>hTERT-immortalized, SV40 transformed, *HRAS* overexpression. A detailed description of the production of the HME, HMLE-Her2, and HMLE-Ras cell lines can be found in Montesion *et al* [32].
