# Supplementary material for: Promoter expression of HERV-K (HML-2) provirus-derived sequences is related to LTR sequence variation and polymorphic transcription factor binding sites
Source: PubMed Central journal article supplement (PMC6102855; doi:10.1186/s12977-018-0441-2), 2018-08-20
Supplement: 12977_2018_441_MOESM10_ESM.pdf [file 12977_2018_441_MOESM10_ESM.pdf]

**Supplementary Table S8.** Primers used to amplify 5' LTRs of transfected HML-2 proviruses.

| Provirus <sup>a</sup> | Amplified Region (hg19)      | BLAST Results (hg19) | Amplified Region (hg38)      | BLAST Results (hg38) | Primer Sequences                                                                        |
|-----------------------|------------------------------|----------------------|------------------------------|----------------------|-----------------------------------------------------------------------------------------|
| 1q22                  | chr1:155,604,094-155,605,800 | 100.0%               | chr1:155,634,303-155,636,009 | 100.0%               | F: 5'-ATTATAGAGCTCCGTTGACTGAGCCATTACCG-3'<br>R: 5'-ATTATAGGTACCTAAAATCCAGCAGCCCAGGA-3'  |
| 3q12.3                | chr3:101,410,385-101,412,176 | 100.0%               | chr3:101,691,541-101,693,332 | 100.0%               | F: 5'-ATTATAGGTACCAAGGAGGCTGAGCAGATGAG-3'<br>R: 5'-ATTATTAAGCTTTTCCAGGGGCATCAGAACT-3'   |
| 3q21.2                | chr3:125,609,085-125,610,870 | 100.0%               | chr3:125,890,242-125,892,027 | 100.0%               | F: 5'-ATTATAGGTACCTCACCACCAACCCAGCTAAT-3'<br>R: 5'-ATTATAGAGCTCTCTGGCGGTTGGGTCTTATT-3'  |
| 5p13.3                | chr5:30,494,698-30,496,674   | 100.0%               | chr5:30,494,591-30,496,567   | 100.0%               | F: 5'-ATTATAGAGCTCCGGCTCTGCTACATATTCGC-3'<br>R: 5'-ATTATAGGTACCGGACACATACACCCTCCCAA-3'  |
| 7p22.1b               | chr7:4,638,489-4,640,273     | 100.0%               | chr7:4,598,858-4,600,642     | 100.0%               | F: 5'-ATTATAGAGCTCCGTTGACTGAGCCATTACCG-3'<br>R: 5'-ATTATAGGTACCAATACCCACAGCACCCAAGA-3'  |
| 8p23.1c               | chr8:12,082,194-12,083,779   | 100.0%               | chr8:12,224,685-12,226,270   | 100.0%               | F: 5'-ATTATAGAGCTCAACCATGGGCGGAATTGTTC-3'<br>R: 5'-ATTATAGGTACCAAGAAGTCCACCTGCCTCAA-3'  |
| 11p15.4               | chr11:3,476,909-3,478,491    | 100.0%               | chr11:3,455,679-3,457,261    | 100.0%               | F: 5'-ATTATAGAGCTCAACCATGGGCGGAATTGTTC-3'<br>R: 5'-ATTATAGGTACCAAGAAGTCCACCTGCCTCAA-3'  |
| 21q21.1               | chr21:19,940,483-19,942,138  | 100.0%               | chr21:18,568,165-18,569,820  | 100.0%               | F: 5'-ATTATAGAGCTCGGTTTACTCTGGTGGCCT-3'<br>R: 5'-ATTATAGGTACCTCATGCAGCCTGTAAGTGGA-3'    |
| 22q11.21              | chr22:18,926,085-18,927,711  | 100.0%               | chr22:18,938,572-18,940,198  | 100.0%               | F: 5'-ATTATAGGTACCTGCCTCAACCTCCCAAAGTAG-3'<br>R: 5'-ATTATAGAGCTCCGGCTCTGCTACATATTCGC-3' |

<sup>a</sup>All provirus constructs were validated by PCR to ensure 100% identity with the human reference genome at the genomic coordinates provided in the amplified region (hg19) column and amplified region (hg38) column.
